# Supplementary material
Source: PubMed Central journal article supplement (PMC5313085)

**Supplementary Figure 1.** (A) HPLC chromatogram (B) and MALDI-TOF spectra of purified glycopeptides Man 317, Man 379, Man 379-ETP, ShortMan379, Man341, Man414, Man341-RPR.

# Man317

A.

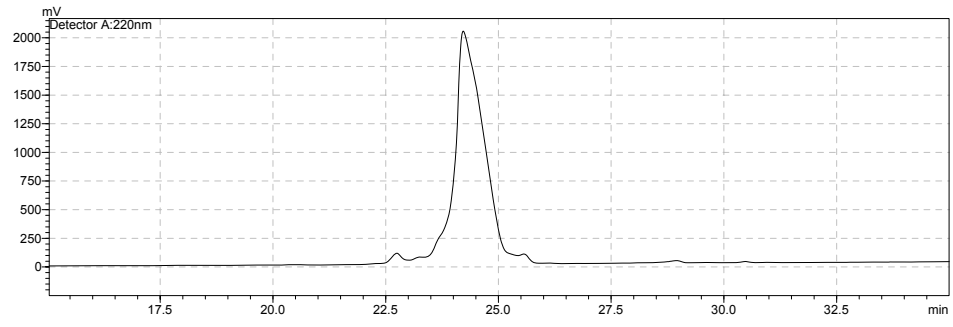

B.

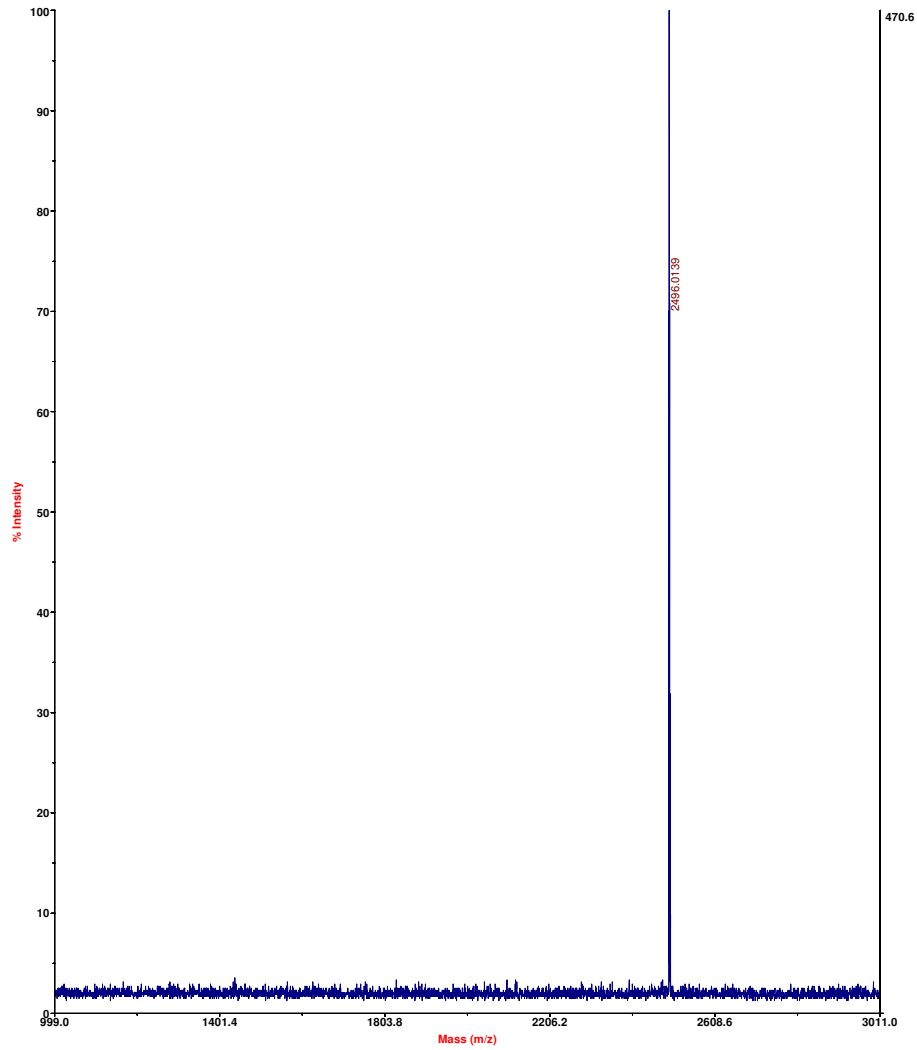

# Man379

A.

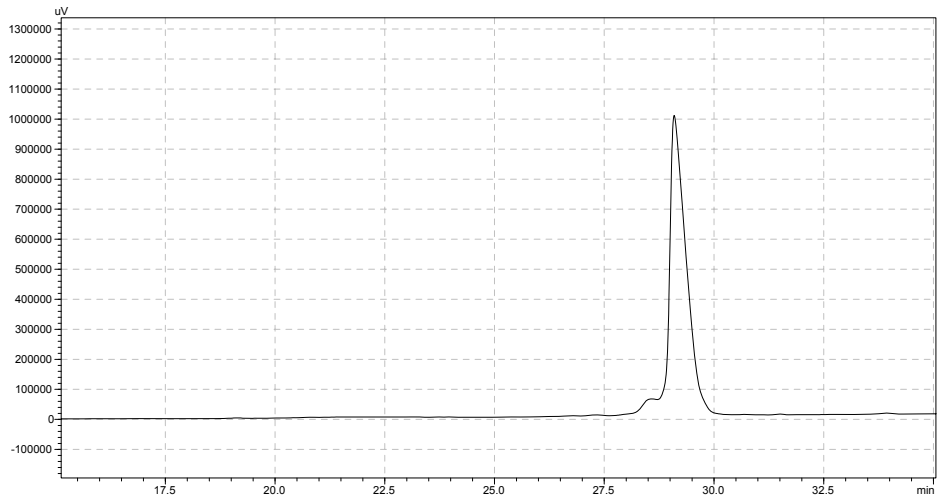

B.

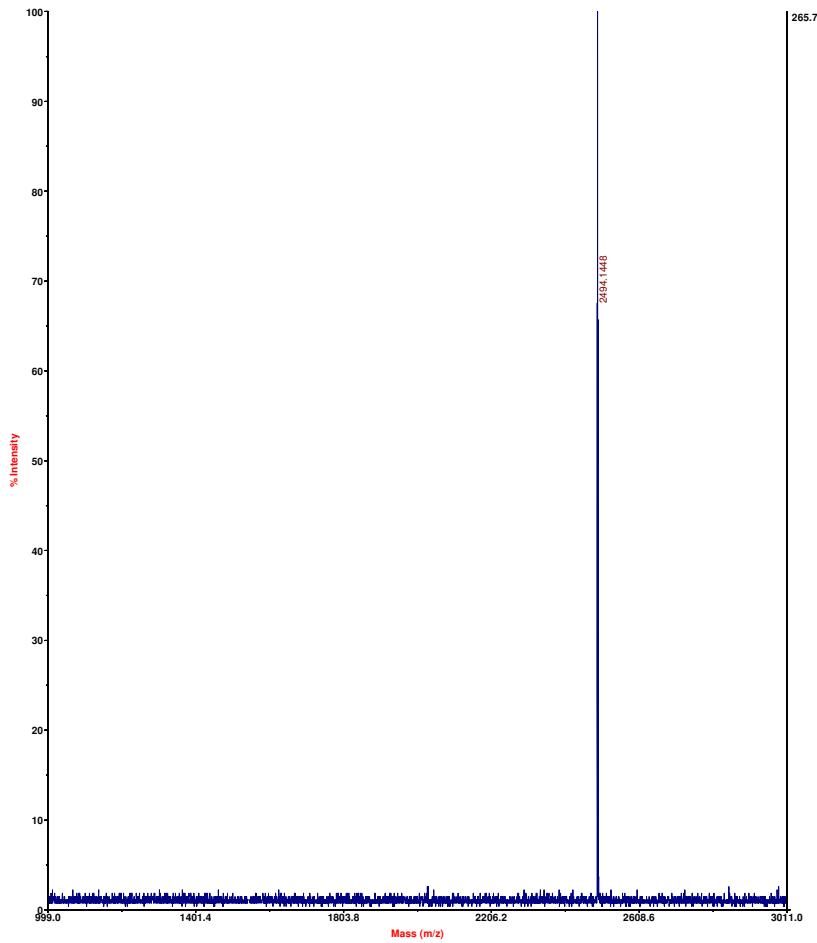

# Man379-ETP

A.

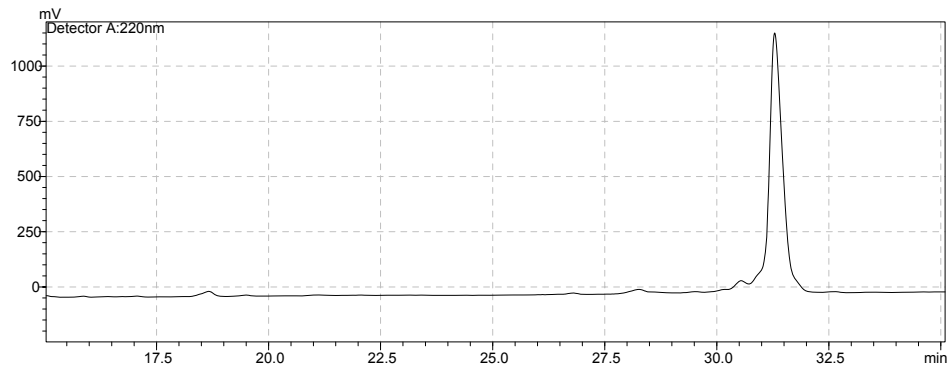

B.

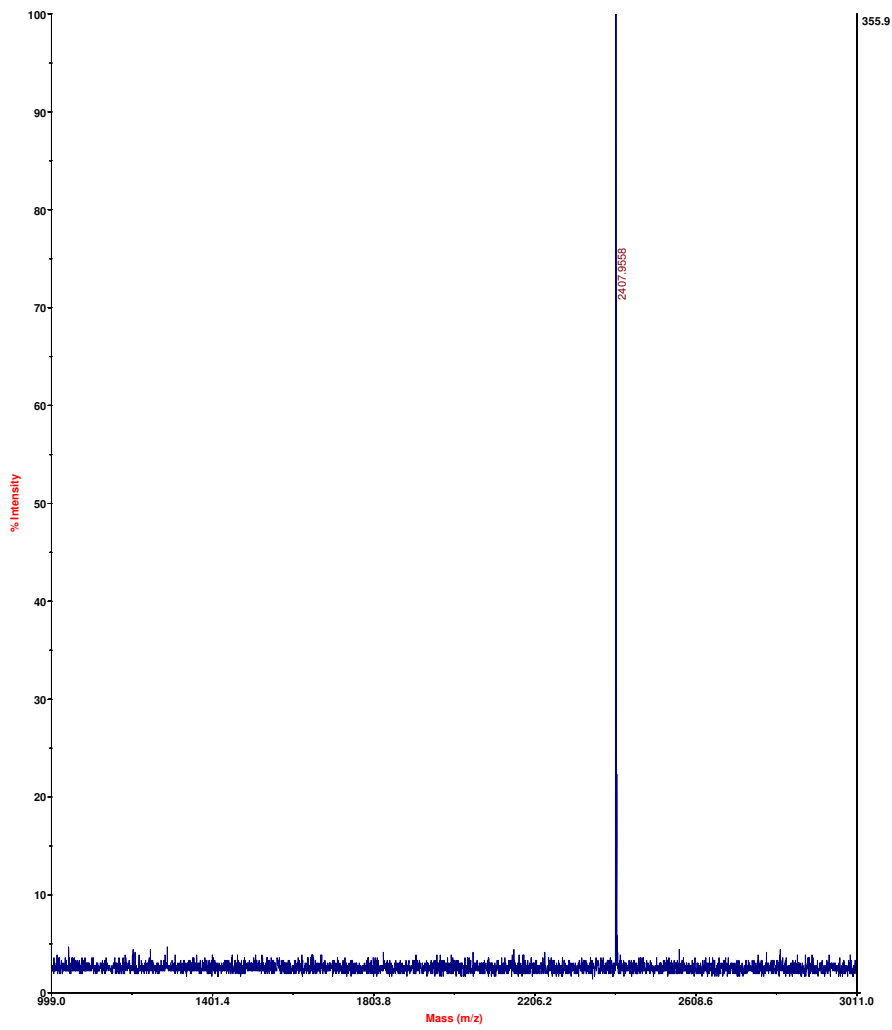

# Short Man379

A.

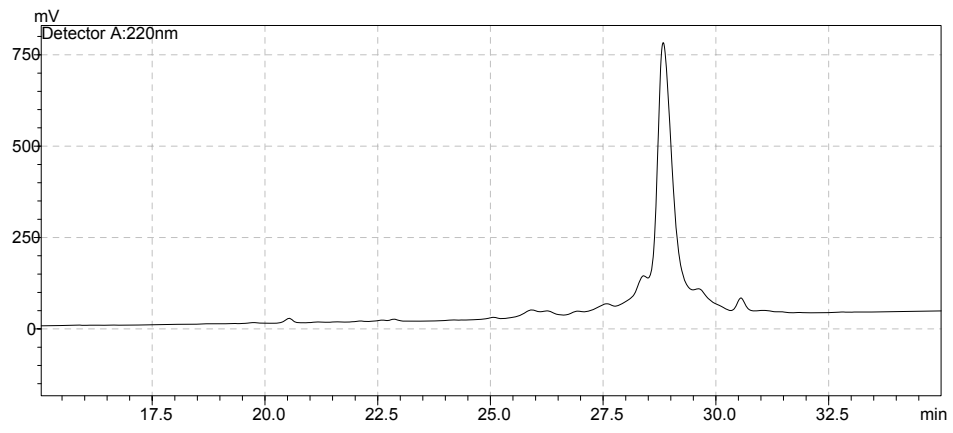

B.

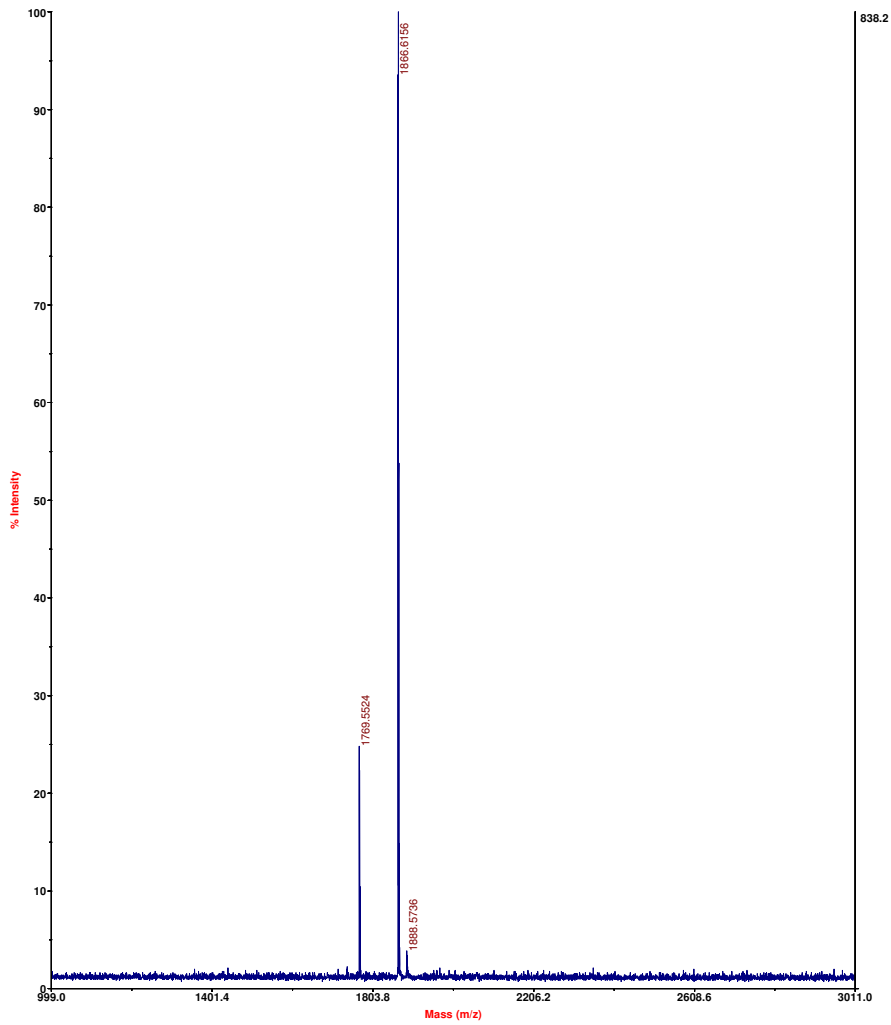

# Man341

A.

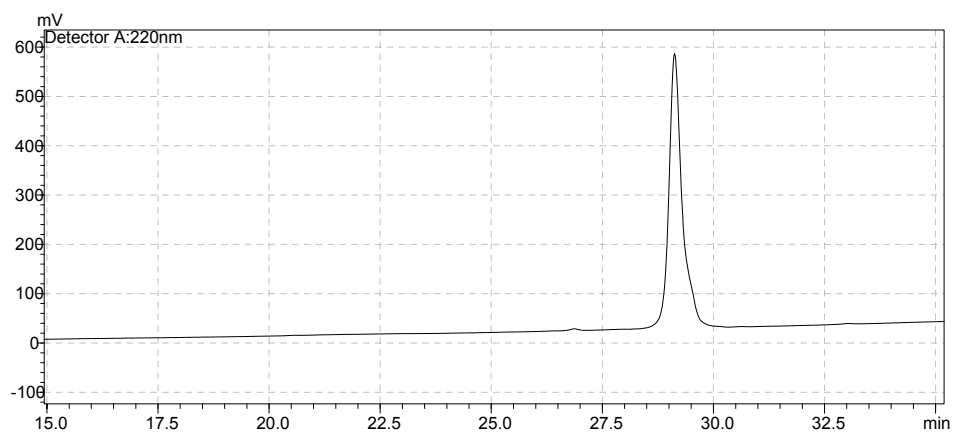

B.

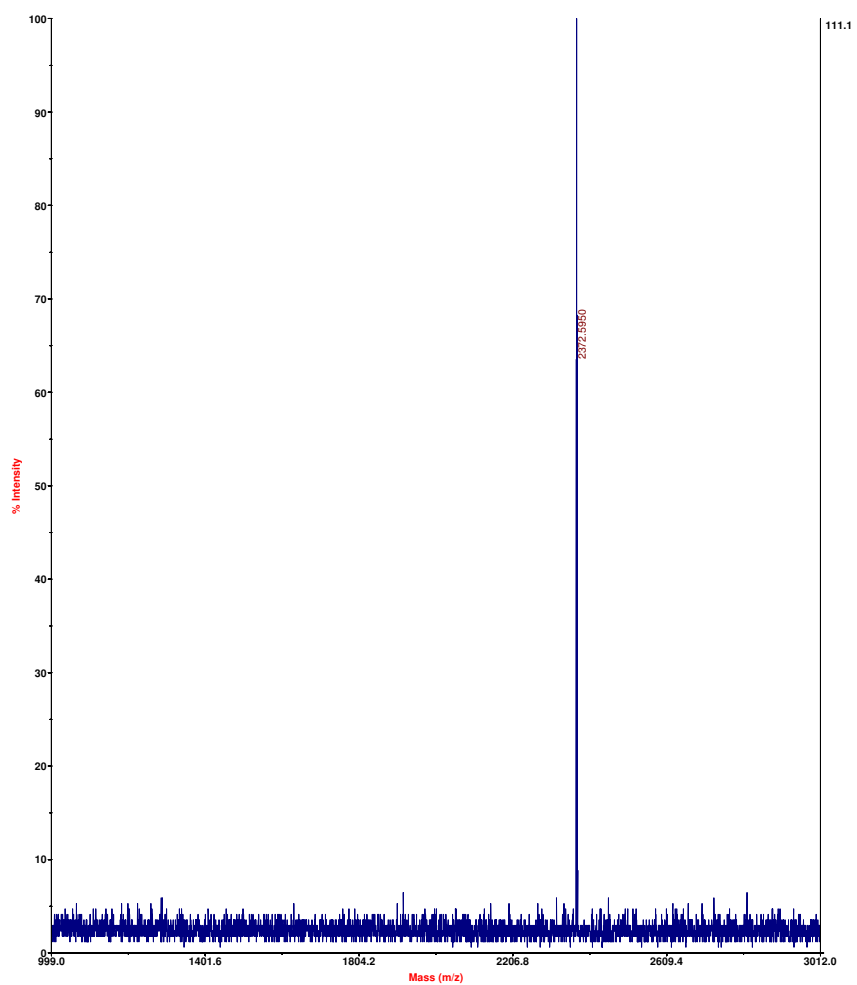

# Man414

A.

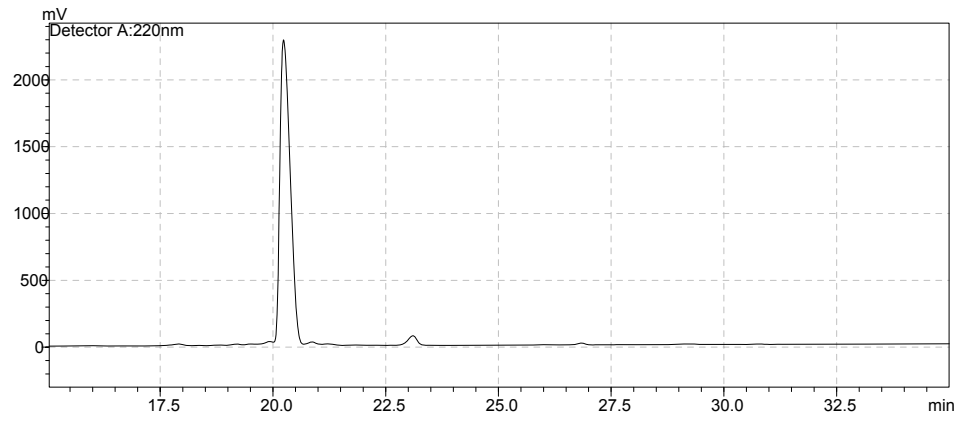

B.

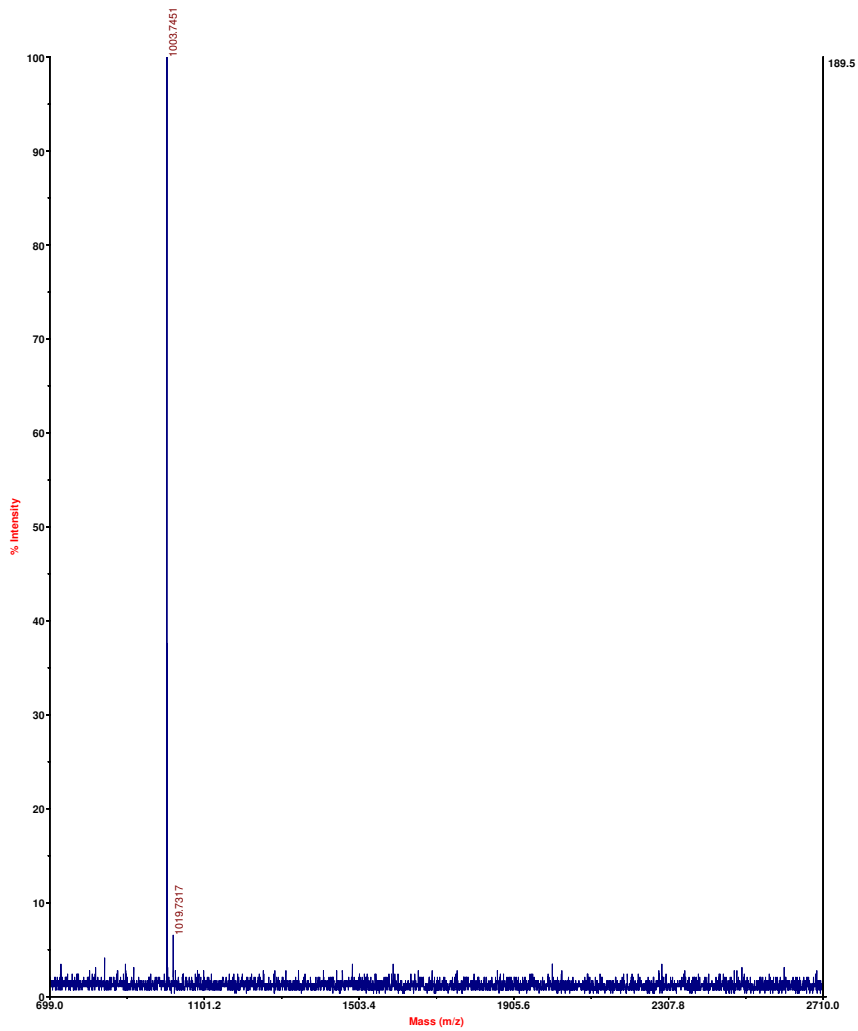

# Man341-RPR

A.

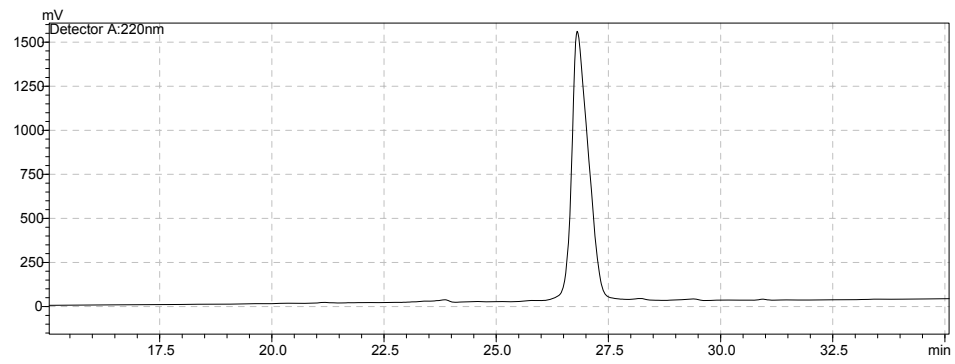

B.

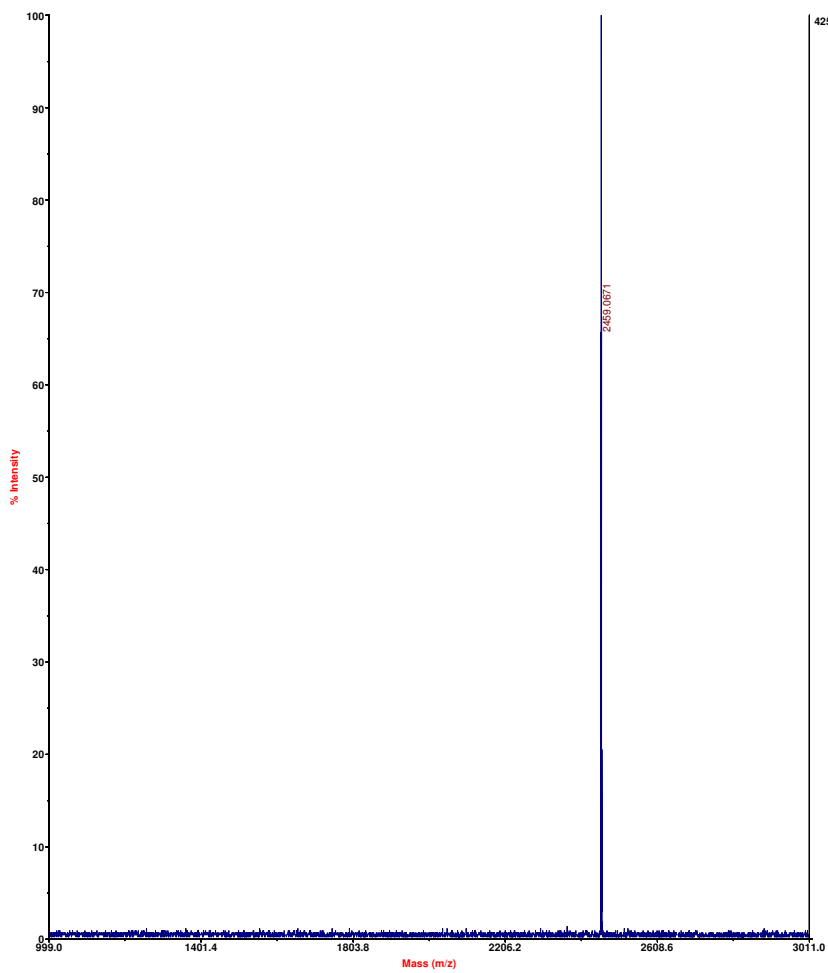

Supplement: 10.1074_M116.764712_jbc.M116.764712-1.pdf [file 10.1074_M116.764712_jbc.M116.764712-1.pdf]
